# Supplementary material for: A Small Molecule Swertisin fromEnicostemma littoraleDifferentiates NIH3T3 Cells into Islet-Like Clusters and Restores Normoglycemia upon Transplantation in Diabetic Balb/c Mice
Source: Hindawi journal article supplement (doi:10.1155/2013/280392), 2013-01-01

**Legends to Supplementary figures:**

**Figure SP-1:** represents densitometric quantification of vimentin protein expression and p-Smad-2 protein expression in 0-8 day time course in various NIH3T3 differentiation islet like clusters groups.

**Figure SP-2:** representing comparative flowcytometry quantification data of islet cell markers from differentiated NIH3T3 islet like clusters and normal mouse islet cells.

### Vimentin protein expression

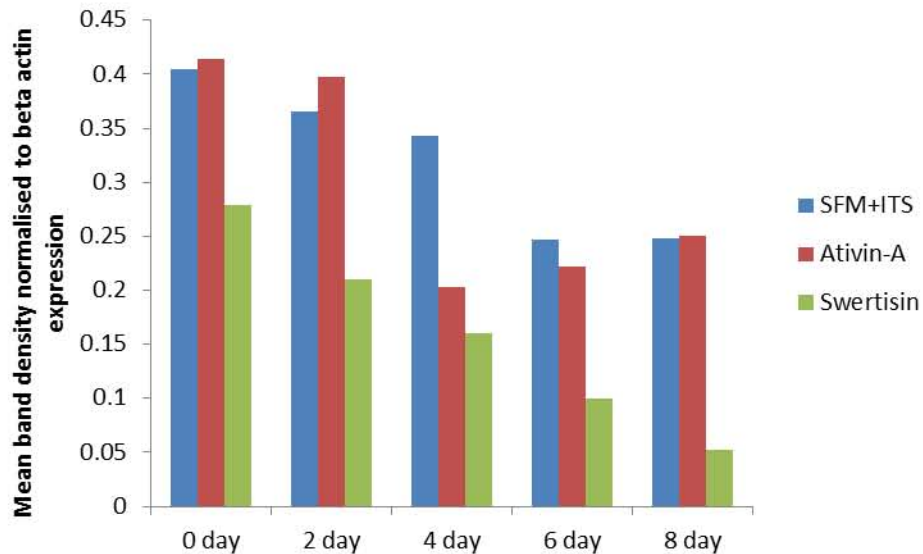

### p-Smad 2 protein expression

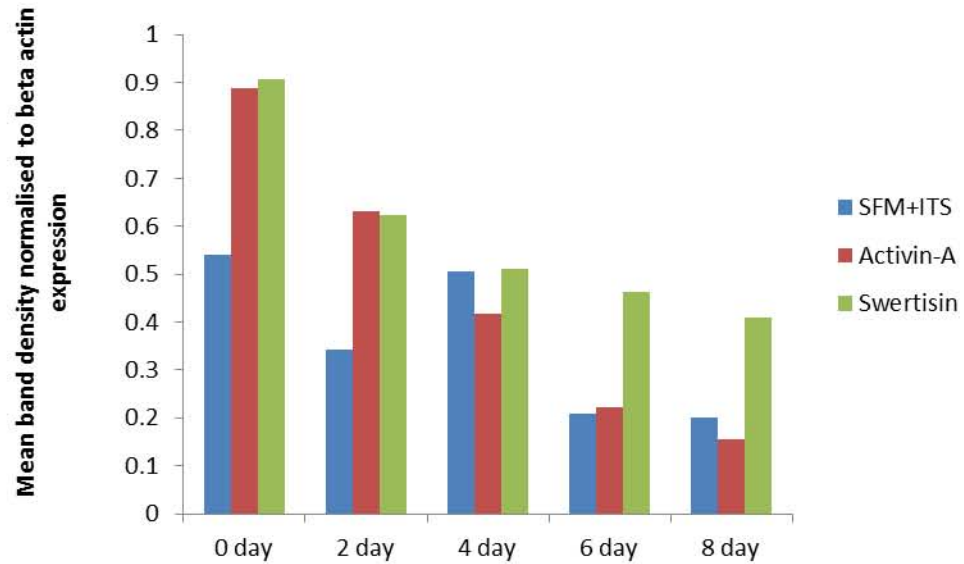

**Insulin****C-peptide****Glucagon**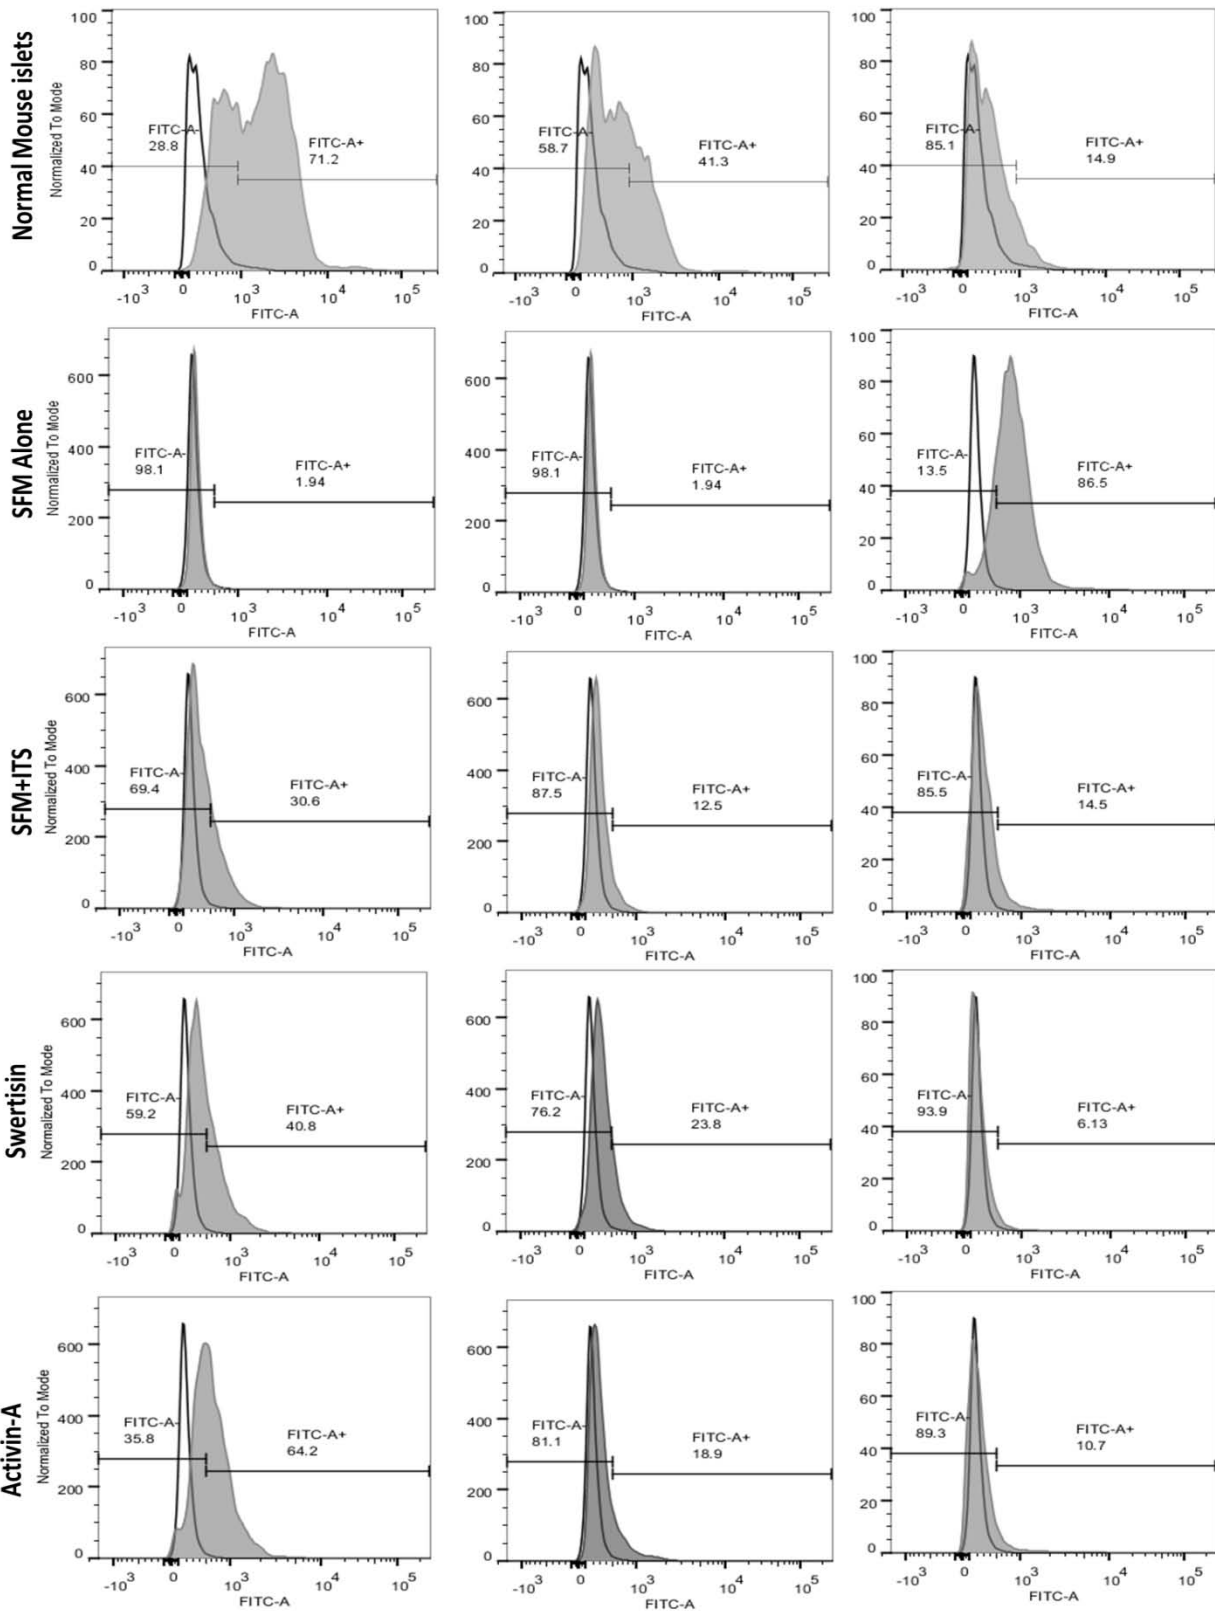

Supplement: f1 [file 280392.f1.pdf]
